# Supplementary material for: The arginine methyltransferase PRMT1 regulates IGF-1 signaling in breast cancer
Source: PubMed Central journal article supplement (PMC6755991; doi:10.1038/s41388-019-0694-9), 2019-01-28
Supplement: 41388_2019_694_MOESM2_ESM.pdf [file 41388_2019_694_MOESM2_ESM.pdf]

## **Supplementary Information**

### **The arginine methyltransferase PRMT1 regulates IGF-1 signaling in breast cancer**

Ali Choucair, Thuy Ha Pham, Soleilmane Omarjee, Julien Jacquemetton, Loay Kassem, Olivier Trédan, Juliette Rambaud, Elisabetta Marangoni, Laura Corbo, Isabelle Treilleux and Muriel Le Romancer.

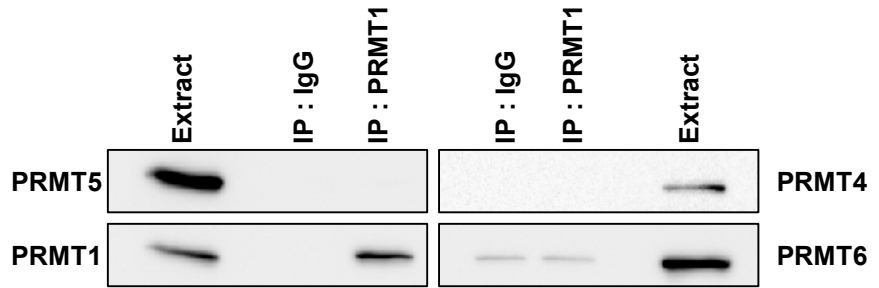

Fig. S1

**Supplementary Fig. 1.** The anti-PRMT1 antibody immunoprecipitates specifically PRMT1. MCF-7 cell lysates were immunoprecipitated with the anti-PRMT1 antibody. We validated the specificity of this experiment by conducting a Western blot to detect the presence of PRMT1, PRMT4, PRMT5 and PRMT6 using the corresponding antibodies.

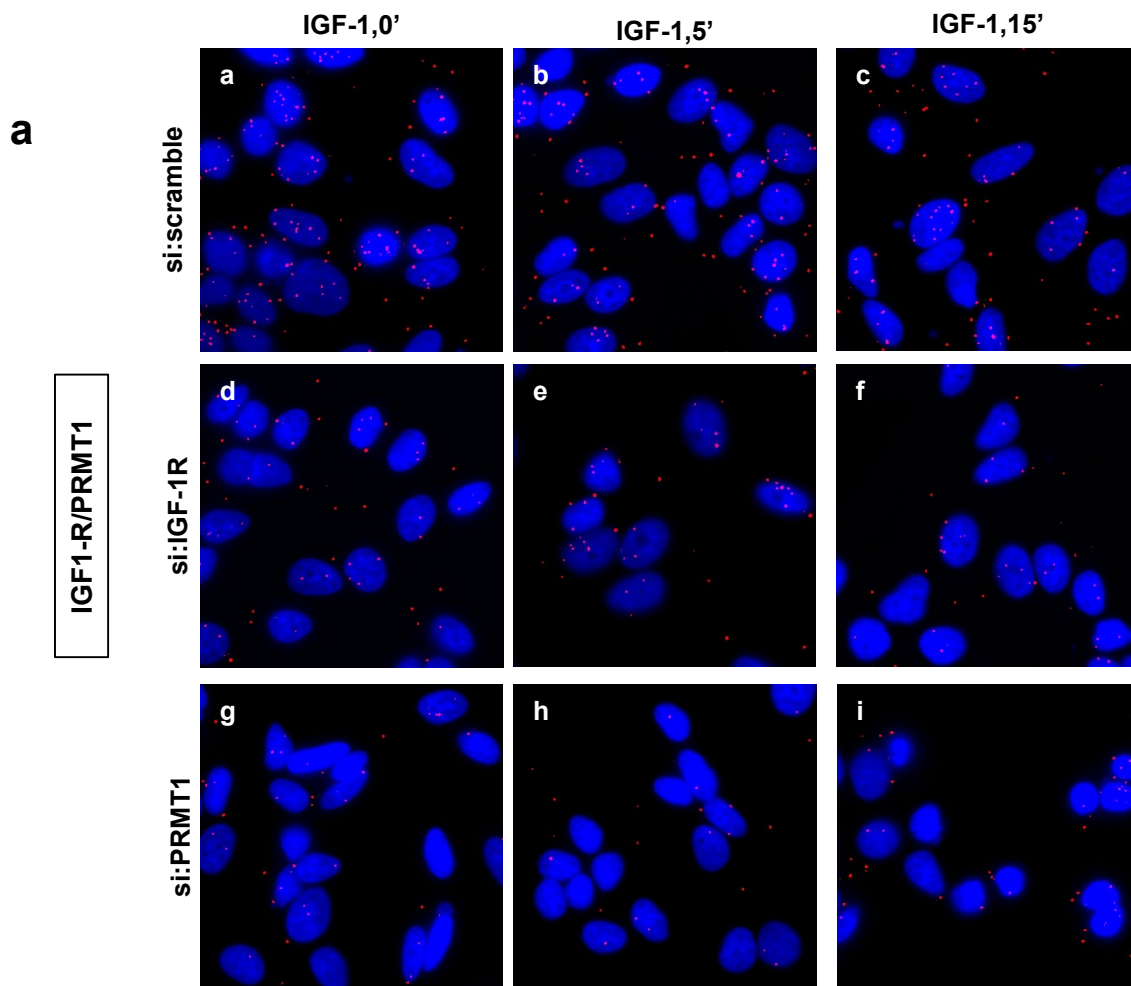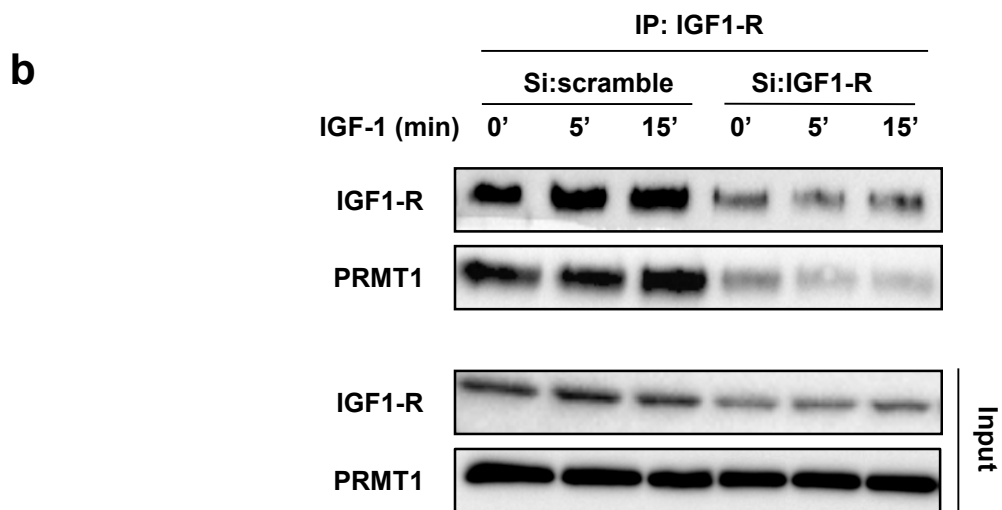

**Supplementary Fig. 2.** IGF-1R interacts with PRMT1.

**a** MCF-7 cells were transfected with si:scramble or siRNAs targeting IGF-1R or PRMT1 for 72 h, then treated with IGF-1 for different periods of time. After fixation, PLA experiments were performed to evaluate IGF-1R/PRMT1 interaction using IGF-1R- and PRMT1-specific antibodies. The detected dimers are represented by red dots. The nuclei were counterstained with mounting medium containing DAPI (blue) (Obj: X60). **b** MCF-7 cells transfected with si:scramble or siRNAs targeting IGF-1R for 72 h, then treated with IGF-1 for different periods of time. Cell extracts were immunoprecipitated with anti-IGF-1R antibody and detected by Western blotting for the presence of PRMT1 and IGF-1R, using the corresponding antibodies. The level of expression of PRMT1 and IGF1-R was also evaluated in the input.

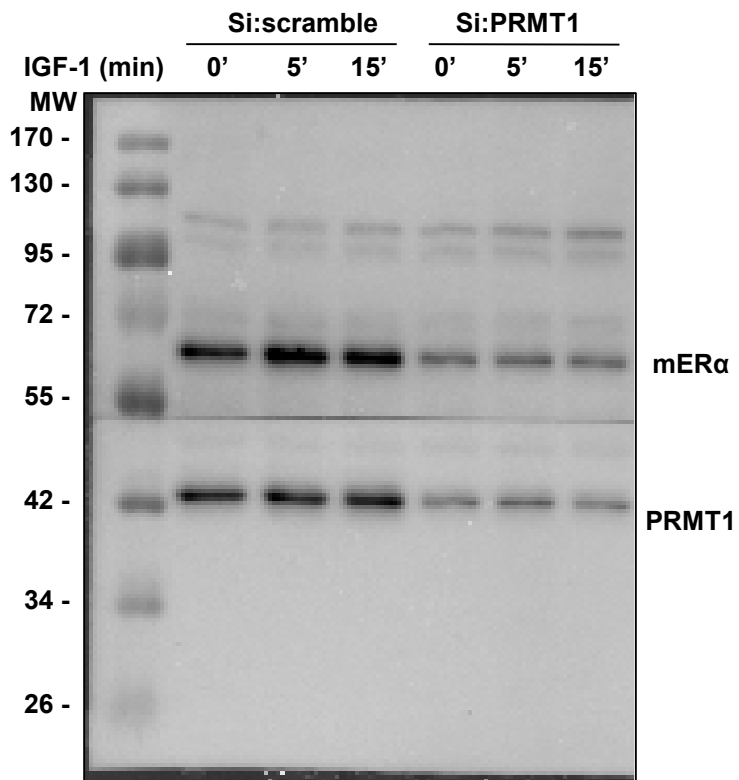

Fig. S3

**Supplementary Fig. 3.** Validation of a new batch of mER $\alpha$  antibody

MCF-7 cells were transfected with si: scramble or a pool of siRNAs targeting PRMT1 for 72 h, and then treated with IGF-1 for different times. The expression of mER $\alpha$  and PRMT1 from Figure 3a is shown as a full panel.

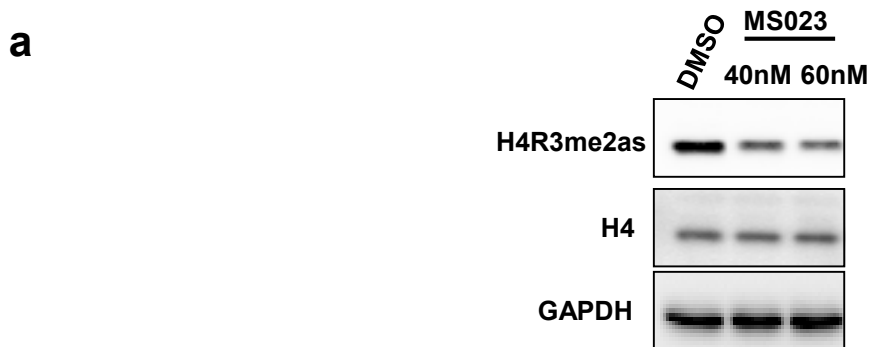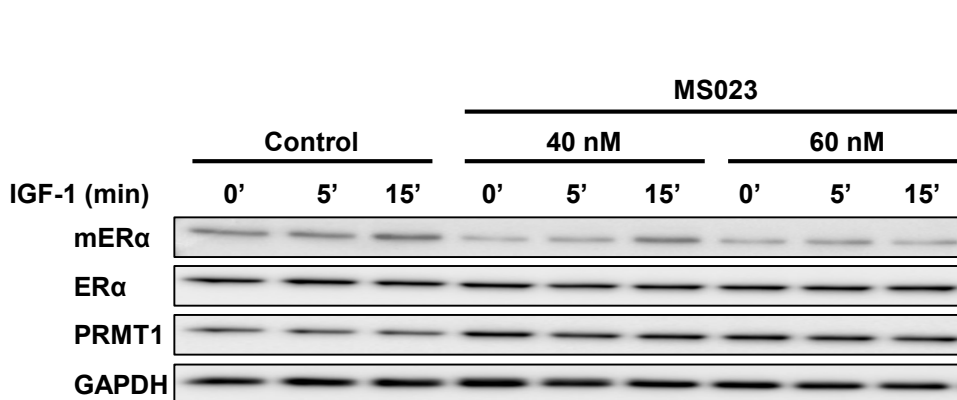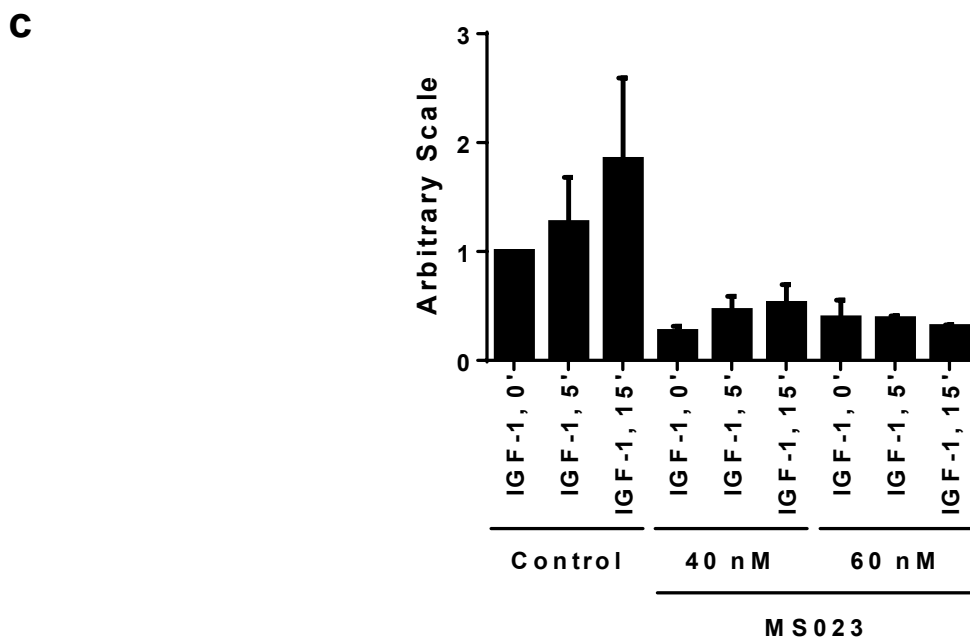

Fig. S4



**Supplementary Fig. 4. Validation of a PRMT1 inhibitor on its activity.**

**a** MCF-7 cells were treated with or without the PRMT1 inhibitor MS023 (40 and 60 nM) for 48 h. Histones were subsequently acid extracted and the expression of histone H4 and asymmetrical dimethylated histone H4 was assessed by Western blot analysis using specific antibodies. **b** MCF-7 cells were treated with or without the PRMT1 inhibitor MS023 (40 and 60 nM), 48 h before IGF-1 treatment. The expression of ER $\alpha$  methylation, ER $\alpha$ , PRMT1 and GAPDH was then assessed by Western blot analysis. **c** Quantification of the signal from two independent experiments was performed by computer-assisted analysis. Normalization was performed according to ER $\alpha$  expression.

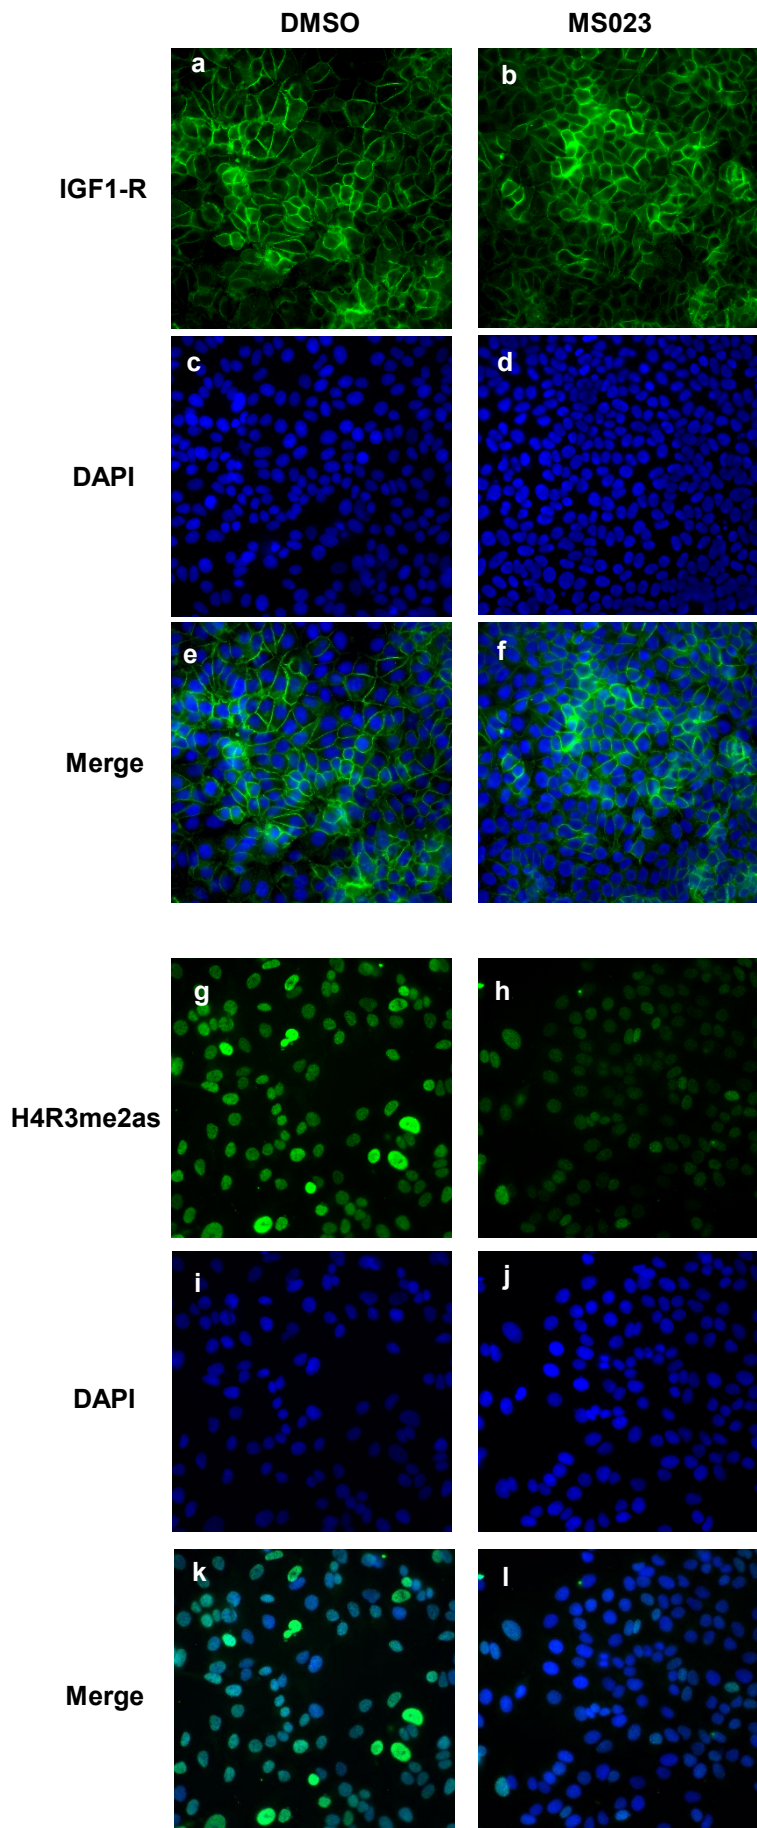

Fig. S5

**Supplementary Fig 5.** Role of PRMT1 on IGF-1R trafficking.

MCF-7 cells were treated with or without the PRMT1 inhibitor MS023 (60 nM) for 48 h. Methanol-fixed cells were then stained with an anti-IGF-1R antibody. The nuclei were counterstained with mounting medium containing DAPI (blue) (Obj: X60). A positive control was used, namely the asymmetrical dimethylated histone H4 antibody.

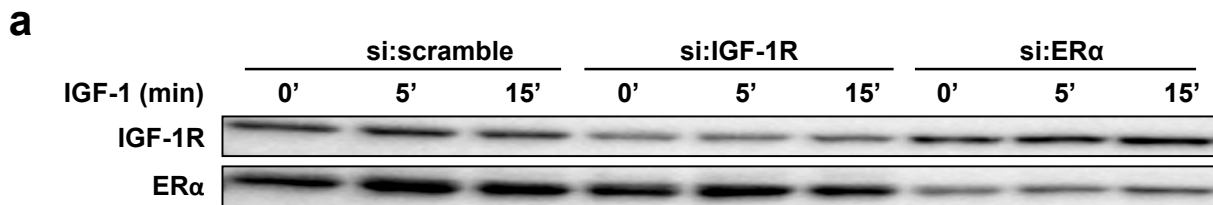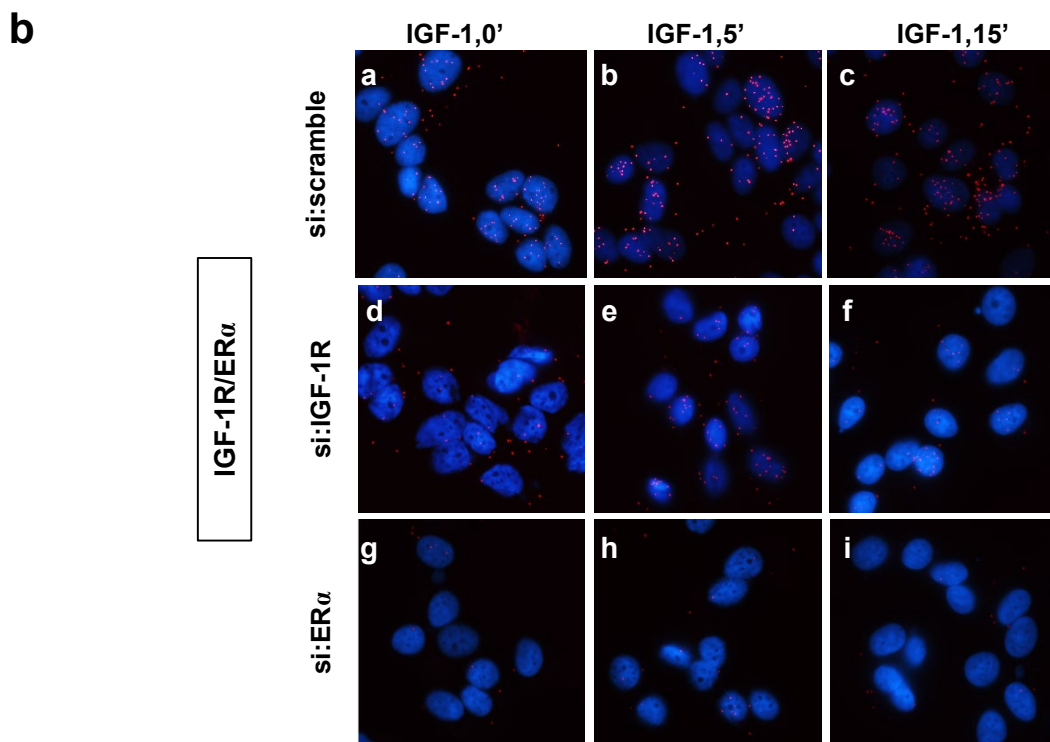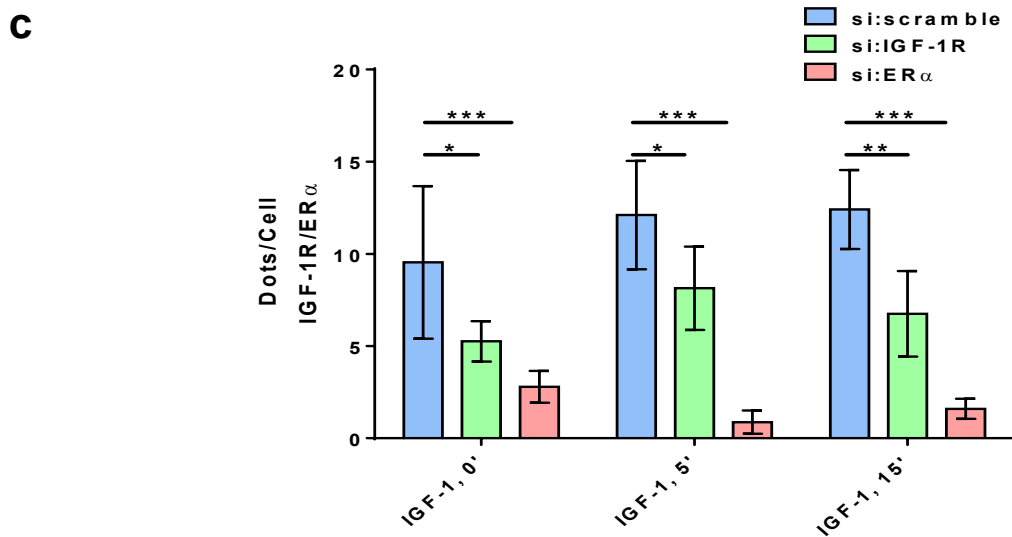

Fig. S6

**Supplementary Fig. 6.** Study of IGF-1R/ER $\alpha$  interaction in MCF-7 cells

**a** MCF-7 cells were transfected with si:scramble or siRNAs targeting IGF-1R or ER $\alpha$  for 72 h, and then treated with IGF-1 for different periods of time. The efficacy of protein inhibition was verified by Western blot analysis using the corresponding antibodies. **b** After siRNA transfection and cell fixation, PLA experiments were performed to evaluate the interactions between IGF-1R/ER $\alpha$  using IGF-1R and ER $\alpha$  specific antibodies. The detected dimers are represented by red dots. The nuclei were counterstained with mounting medium containing DAPI (blue) (Obj: x60). **c** Quantification of the number of dots per cell was performed by computer-assisted analysis as reported in the Materials and Methods section. The mean  $\pm$  s.e.m. of one experiment representative of three experiments is shown. The *P*-value was determined using the Student t-test. \* *P* < 0.05, \*\*\* *P* < 0.001.

**a**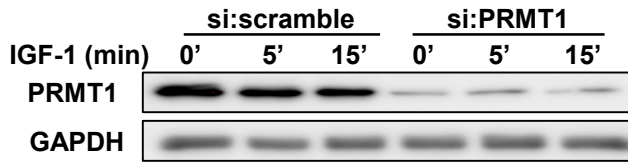**b**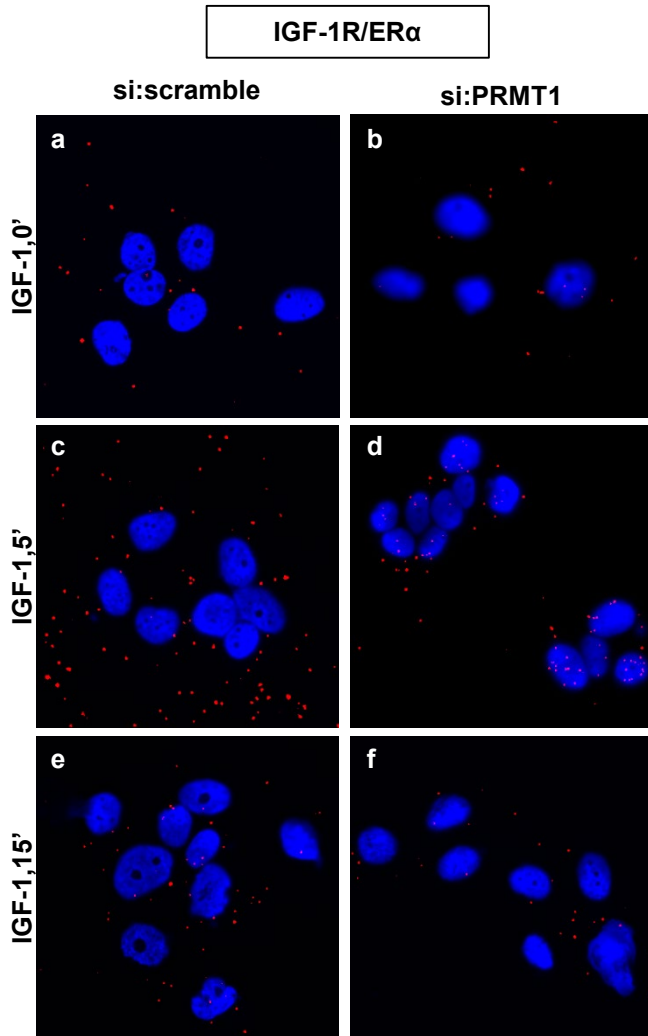**c**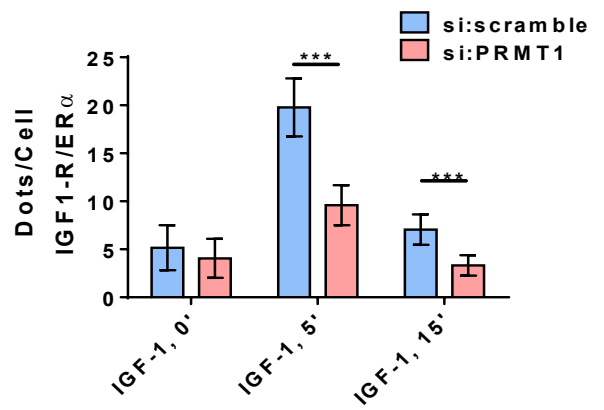

**Supplementary Fig. 7. PRMT1 influences IGF-1R/ER $\alpha$  interaction**

**a** MCF-7 cells were transfected with si: scramble or a pool of siRNAs targeting PRMT1 for 72 h, and then treated with IGF-1 for different times. The silencing of PRMT1 was evaluated by Western blot using the PRMT1 antibody and GAPDH expression was used as a loading control. **b** After cell fixation, PLA experiments were carried out to quantify the interactions between IGF-1R/ER $\alpha$  in MCF-7 cells transfected with siRNAs as described in a. **c** Quantification of the number of dots per cell was performed as reported in the Materials and Methods section. The mean  $\pm$  s.e.m. of one experiment representative of three experiments is shown. The *P*-value was determined using the Student t-test. \*\*\* *P* < 0.001.

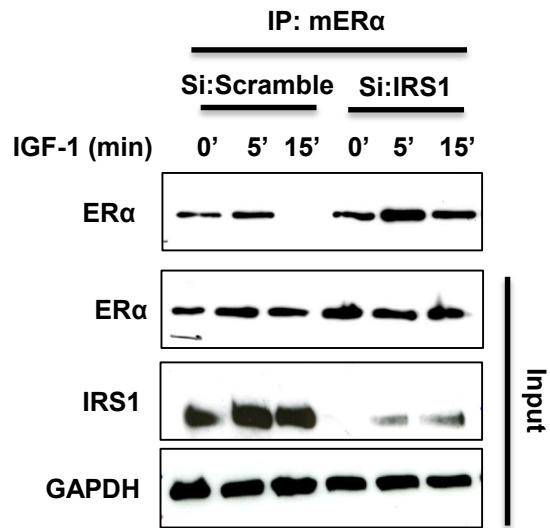

**Fig. S8**



**Supplementary Fig. 8.** Role of IRS1 on ER $\alpha$  methylation.

MCF-7 cells were transfected with si:scramble or siRNAs targeting IRS1 for 72 h, and then treated with IGF-1 for different periods of time. mER $\alpha$  was then immunoprecipitated with the specific antibody followed by Western blotting with anti-ER $\alpha$  antibody. IRS1 ER $\alpha$  and GAPDH expression levels were evaluated in the total cell extracts.



**Supplementary Fig. 9.** Interaction between ER $\alpha$  and IGF-1R.

**a** This figure presents the different structural domains of the intracellular domain (ICD) of IGF-1R. The ICD is divided into 3 domains: the D1 domain contains the IRS1 and Shc binding domain, the D2 domain contains the kinase activity and the D3 domain has an unknown function. **b** GST pull-down assay was performed by incubating *in vitro* <sup>35</sup>S-labeled ER $\alpha$  with GST, GST-ICD, GST-D1, GST-D2 and GST-D3 of IGF-1R. The corresponding Coomassie-stained gel is shown in the right-hand panel. \* indicates the full length fusion proteins.

**a**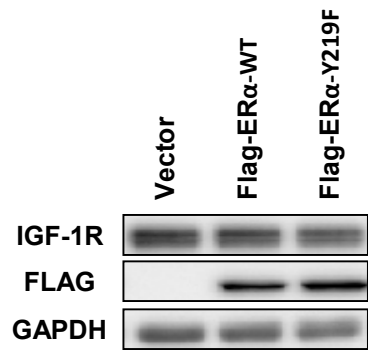**b**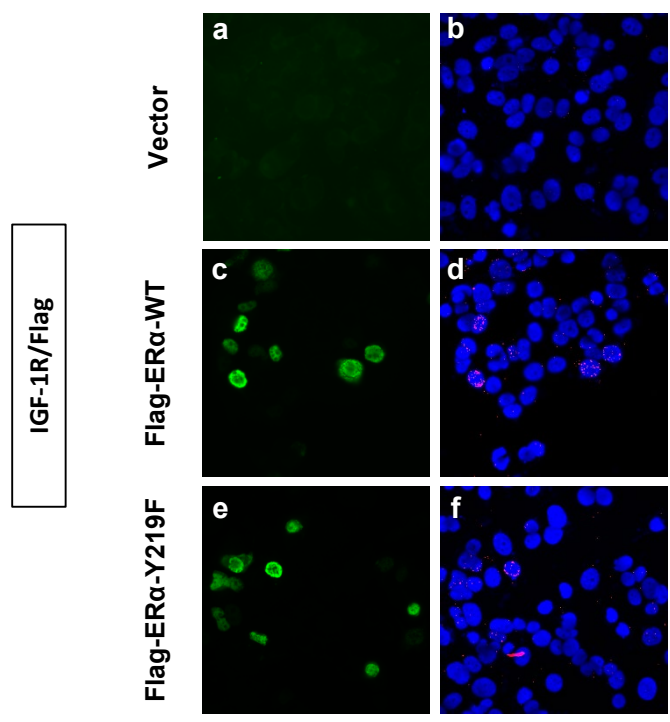**c**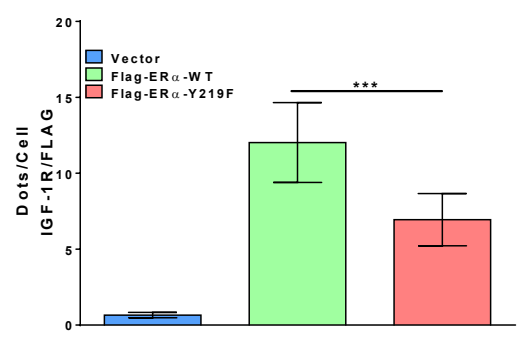

**Supplementary Fig. 10.** ER $\alpha$  phosphorylation regulates ER $\alpha$  binding to IGF-1R.

**a** MCF-7 cells were transfected with empty pSG5, pSG5-Flag ER $\alpha$  WT or the mutant pSG5-Flag ER $\alpha$  Y219F. The expression of the transfected ER $\alpha$  was assessed by Western blot analysis using the anti-Flag and anti-GAPDH antibodies. **b** PLA experiments were performed to evaluate the interactions between endogenous IGF-1R and transfected ER $\alpha$  using a mouse anti-IGF-1R antibody and a rabbit anti-Flag antibody. The transfected cells were visualized by adding secondary anti-rabbit antibody coupled with Alexa 488 and the nuclei were counterstained with mounting medium containing DAPI (blue) (Obj: X60). **c** Quantification of the number of dots per cell was performed as described in the Materials and Methods section, except that the counting was performed only in transfected cells. The mean  $\pm$  s.e.m. of one experiment representative of four experiments is shown. The *P*-value was determined using the Student t-test. \*\*\* *P* < 0.001.

**Supplementary Table 1.** List of the targeted sequences for siRNA experiments

| <b>siRNA</b>   | <b>Sequence (5'-3')</b> | <b>Reference</b> | <b>Supplier</b> |
|----------------|-------------------------|------------------|-----------------|
| si:scramble    |                         | SR-CL000-005     | Eurogentec      |
| si-PRMT1       |                         | 110970           | Ambion          |
| si:ER $\alpha$ | GAAUGUGCCUGGCUAGAGAdTdT |                  |                 |
| si:IGF-1R      | CUGACUACAGGGAUCUCAUdTdT |                  |                 |

**Supplementary Table 2.** List and origin of the antibodies used in the current work

| Antibody                 | Company      | Ref.       | Species | WB     | IP    | PLA    | IHC  | IF    |
|--------------------------|--------------|------------|---------|--------|-------|--------|------|-------|
| Akt                      | CST          | 9272       | rabbit  | 1:1000 |       |        |      |       |
| ER $\alpha$ -60C         | Merck        | 04-820     | rabbit  | 1:1000 |       |        |      |       |
| ER $\alpha$ -HC20        | Santa Cruz   | sc-543     | rabbit  |        |       | 1:500  |      |       |
| Flag                     | CST          | 14793      | rabbit  | 1:500  |       | 1:2000 |      |       |
| Histone H4               | Merck        | 07-108     | rabbit  | 1:500  |       |        |      |       |
| H4R3me2as                | Active motif | 39705      | rabbit  | 1:500  |       |        |      | 1:500 |
| IGF-1R $\beta$           | CST          | 9750       | rabbit  | 1:1000 | 1:100 |        |      | 1:500 |
| IGF-1R $\beta$           | Santa Cruz   | Sc-81167   | mouse   |        |       | 1:750  |      |       |
| IGF-1R $\beta$           | CST          | 3027       | rabbit  |        |       |        | 1:25 |       |
| IRS1                     | CST          | 3407       | rabbit  | 1:1000 |       |        |      |       |
| p-IRS1(Y608/Y612)        | Millipore    | 09-432     | mouse   | 1:1000 |       |        |      |       |
| Erk                      | CST          | 4695       | rabbit  | 1:2000 |       |        |      |       |
| mER $\alpha$             | Home made    | 2D10       | mouse   | 1:1000 | 1:100 |        |      |       |
| p-Akt (Ser473)           | CST          | 9271       | rabbit  | 1:1000 |       |        |      |       |
| p-IGF-1R $\beta$ (Y1135) | CST          | 3918       | rabbit  | 1:1000 |       |        |      |       |
| p-Erk                    | CST          | 4370       | rabbit  | 1:1000 |       |        |      |       |
| P85-PI3K                 | Millipore    | 05-212     | rabbit  | 1:1000 |       |        |      |       |
| P85-PI3K                 | Abcam        | Ab22653    | mouse   |        |       | 1:100  |      |       |
| PRMT1                    | Millipore    | 07-404     | rabbit  |        |       | 1:500  |      |       |
| PRMT1                    | Bethyl       | A300-722A1 | rabbit  |        | 1:100 |        |      |       |
| PRMT1                    | CST          | 2449       | rabbit  | 1:1000 |       |        |      |       |
| PRMT5                    | Millipore    | 07-405     | rabbit  | 1:1000 |       |        |      |       |
| PRMT4                    | CST          | 3379       | rabbit  | 1:1000 |       |        |      |       |
| PRMT6                    | CST          | 14641      | rabbit  | 1:1000 |       |        |      |       |
| Shc                      | Millipore    | 06-203     | rabbit  | 1:1000 |       |        |      |       |
| p-Shc (Y239/240)         | CST          | 2434       | rabbit  | 1:1000 |       |        |      |       |
| GAPDH                    | Santa Cruz   | Sc-47724   | mouse   | 1:2000 |       |        |      |       |
| Src                      | Santa Cruz   | sc-8056    | mouse   | 1:1000 |       | 1:100  |      |       |

**Supplementary Table 3.** Sample description: distribution of clinical parameters

Clinical parameters were analyzed for the 440 patients included in the TMA study.

| <b>Characteristic</b>            |                                 | <b>Number</b> | <b>percent</b> |
|----------------------------------|---------------------------------|---------------|----------------|
| <b>Age group</b>                 | <i>≤ 50 years</i>               | 113           | 26.1%          |
|                                  | <i>&gt;50 years</i>             | 320           | 73.9%          |
| <b>Menopausal status</b>         | <i>Premenopausal</i>            | 121           | 28.5%          |
|                                  | <i>Post-menopausal</i>          | 303           | 71.5%          |
|                                  | <i>Unknown</i>                  | 9             |                |
| <b>BMI</b>                       | <i>≤ 25 kg/m<sup>2</sup></i>    | 258           | 61.9%          |
|                                  | <i>&gt; 25 kg/m<sup>2</sup></i> | 159           | 38.1%          |
|                                  | <i>Missing</i>                  | 16            |                |
| <b>Tumor size</b>                | <i>≤2cm</i>                     | 252           | 58.2%          |
|                                  | <i>&gt;2cm</i>                  | 181           | 41.8%          |
| <b>Axillary LN metastasis</b>    | <i>No</i>                       | 184           | 42.5%          |
|                                  | <i>Yes</i>                      | 249           | 57.5%          |
| <b>SBR grade</b>                 | <i>I</i>                        | 82            | 18.9%          |
|                                  | <i>II</i>                       | 207           | 47.8%          |
|                                  | <i>III</i>                      | 144           | 33.3%          |
| <b>ERα status</b>                | <i>Negative</i>                 | 56            | 12.9%          |
|                                  | <i>Positive</i>                 | 377           | 87.1%          |
| <b>PR status</b>                 | <i>Negative</i>                 | 109           | 25.2%          |
|                                  | <i>Positive</i>                 | 324           | 74.8%          |
| <b>HER2 status</b>               | <i>Negative</i>                 | 397           | 92.8%          |
|                                  | <i>Positive</i>                 | 31            | 7.2%           |
|                                  | <i>Missing</i>                  | 5             |                |
| <b>Breast cancer subtype</b>     | <i>Luminal A</i>                | 243           | 56.1%          |
|                                  | <i>Luminal B</i>                | 134           | 30.9%          |
|                                  | <i>HER2 enriched</i>            | 11            | 4.6%           |
|                                  | <i>TNBC</i>                     | 45            | 10.4%          |
| <b>Adjuvant hormonal regimen</b> | <i>Tamoxifen</i>                | 173           | 46.6%          |
|                                  | <i>Tam-AI</i>                   | 198           | 53.4%          |
|                                  | <i>Missing</i>                  | 62            |                |



## **Supplementary Materials and Methods**

### **Primers and cloning**

The following primers were used to clone the domains of ICD of IGF-1R:

**IGF-1R ICD D1 Fwd: 5' CATAGAAAGAGAAATAACAGCAGG 3'**

IGF-1R ICD D1 Rev: 5' CTCGAGCTTCTCCCGAGCCACCTCCC 3'

IGF-1R ICD D2 Fwd: 5' GGATCCATCACCATGAGCCGGGAACTTG 3'

IGF-1R ICD D2 Rev: 5' CTCGAGGAAGCCAGGCTCCATCTCCTC 3'

IGF-1R ICD D3 Fwd: 5' GGATCCCGGGAGGTCTCCTTCTACTACAG 3'

**IGF-1R ICD D3 Rev: 5' CTCGAGTCAGCAGGTCTCGAAGACTGGGGC 3'**

The primer sequences in bold were used to clone the full ICD of IGF-1R.

ICD and its fragments were cloned into the pGEX4T1 vector in BamH1/Xho1 sites in phase with the GST. The constructs were verified by sequencing.

### **Immunofluorescence**

MCF-7 cells ( $7 \times 10^4$ ) were grown on coverslips in 12-well plates. After treatment, cells were fixed in methanol for 2 min and washed twice in PBS. Non-specific binding was blocked using a 1% gelatin solution for 30 min at room temperature and cells were incubated with primary antibodies for 1 h at 37°C. After PBS washes, the cells were incubated for another 1 h at 37°C with the secondary antibody Alexa Fluor 488 (Molecular Probes) in Dako diluent, then washed in PBS and mounted on glass slides in mounting solution (Dako). The images were acquired using a fluorescent microscope.

### **Histone extraction**

80  $\mu$ l of Buffer (20mM Tris-HCl with pH 8.8 and 20mM CaCl<sub>2</sub>) was added into ( $5 \times 10^6$ ) cells. The suspension was mixed well before 9 $\mu$ l of 3% SDS and 10%  $\beta$ -mercaptoethanol (100 $\mu$ l  $\beta$ -mercaptoethanol, 300  $\mu$ l SDS and 600  $\mu$ l H<sub>2</sub>O) were loaded. The mixture then was boiled at

95°C in water bath for 2min then cooled in ice. After that, 5 µl of DNase solution along with 5 µl of RNase solution in Buffer 2 (500 mM Tris-HCl with pH 7.0 and 50 mM MgCl<sub>2</sub>) were applied. The sample then was mixed well for being homogenous, followed by being boiled with Laemli 1X for 5 min and analyzed by Western blotting.
